# Supplementary material for: Phenothiazine based blue emitter for light-emitting electrochemical cells
Source: Royal Society of Chemistry journal article supplement (doi:10.1039/c7nj00976c), 2017-01-01
Supplement: c7nj00976c1.pdf [file c7nj00976c1.pdf]

**Electronic Supplementary Information (ESI)**

**Phenothiazine based blue emitter for light-emitting electrochemical cells**

Kanagaraj Shanmugasundaram,<sup>a</sup> Ramesh Kumar Chitumalla,<sup>b</sup> Joonkyung Jang,<sup>b</sup> Youngson  
Choe<sup>\*a</sup>

<sup>a</sup>School of Chemical and Biomolecular Engineering, Pusan National University, Busan 609-735,  
Republic of Korea.

<sup>b</sup>Department of Nanoenergy Engineering, Pusan National University, Busan, 609-735, Republic  
of Korea.

\* Corresponding author: Prof. Youngson Choe

Email: [choe@pusan.ac.kr](mailto:choe@pusan.ac.kr)

Tel.: +8251 510 2396;

Fax: +8251 512 8634.

**Table of contents**

|                                                                                             |    |
|---------------------------------------------------------------------------------------------|----|
| Structures of PPP and PPPSO <sub>2</sub> .....                                              | S3 |
| <sup>1</sup> H-NMR spectrum of PPPSO <sub>2</sub> .....                                     | S3 |
| Thin film absorption and emission spectrum of PPPSO <sub>2</sub> .....                      | S4 |
| Transient PL spectra of PPPSO <sub>2</sub> in an oxygen-free toluene solution .....         | S4 |
| Emission spectra of PPPSO <sub>2</sub> in different solvents .....                          | S5 |
| The DFT optimized ground state geometry of the compound PPPSO <sub>2</sub> .....            | S5 |
| The UV-visible absorption spectrum of PPPSO <sub>2</sub> simulated in dichloromethane ..... | S6 |
| The results of TDDFT calculations .....                                                     | S6 |

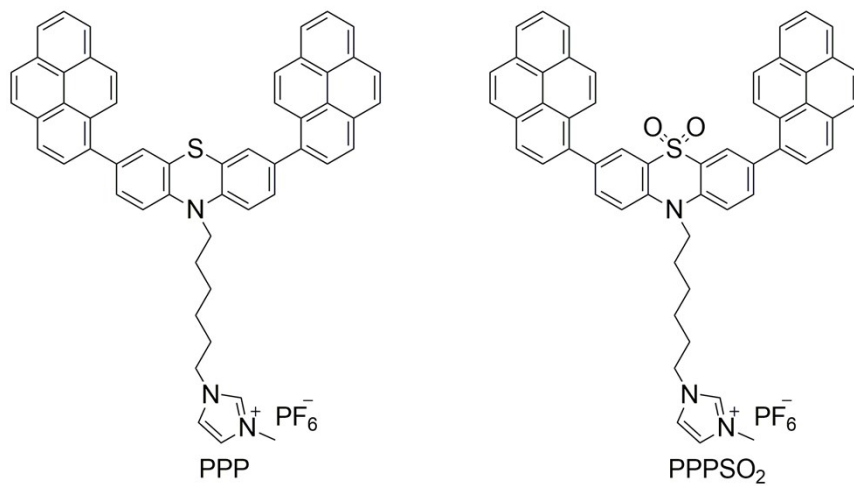

**Fig. S1** Structures of PPP and PPPSO<sub>2</sub>.

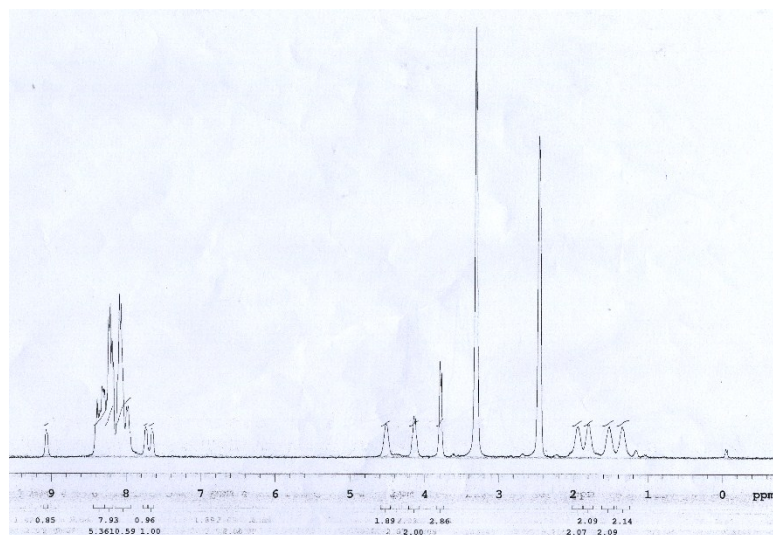

**Fig. S2** <sup>1</sup>H-NMR spectrum of PPPSO<sub>2</sub>.

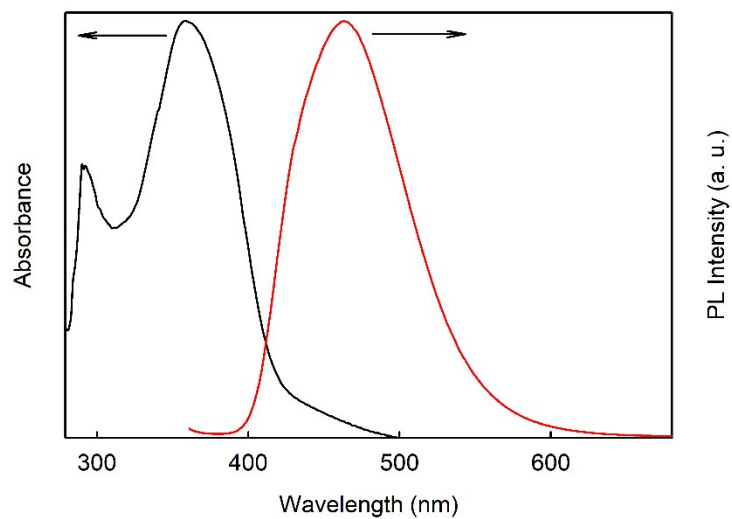

**Fig. S3** Thin film absorption and emission spectrum of PPPSO2.

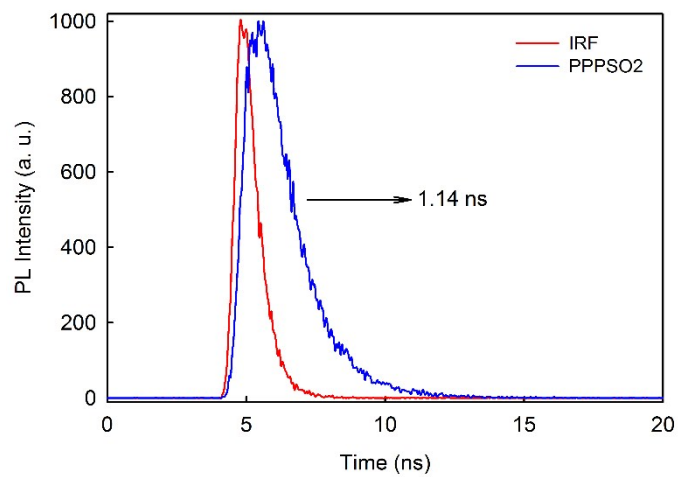

**Fig. S4** Transient PL spectra of PPPSO2 in oxygen-free toluene solution.

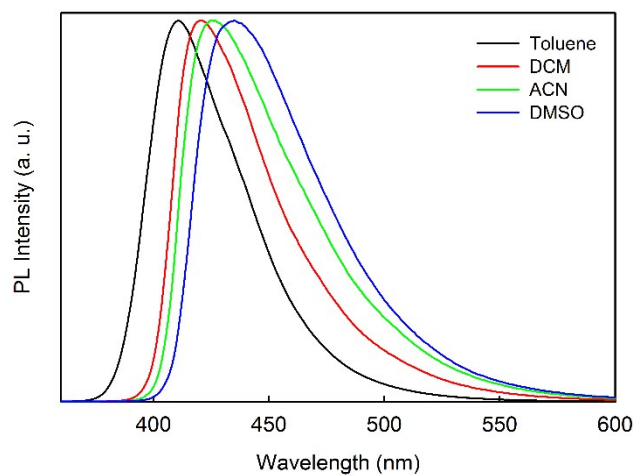

**Fig. S5** Emission spectra of PPPSO2 in different solvents.

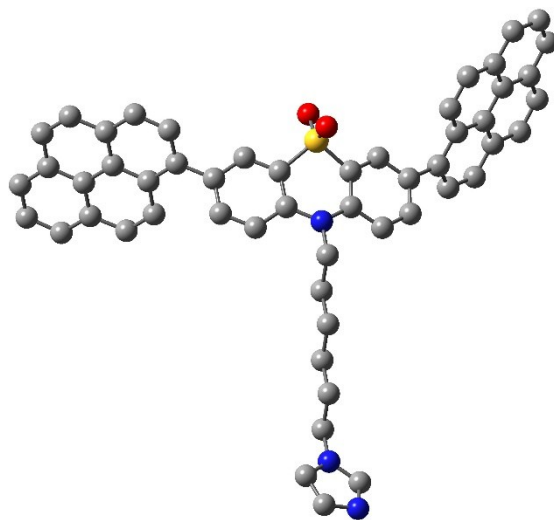

**Fig. S6** The DFT optimized ground state geometry of the compound PPPSO2.

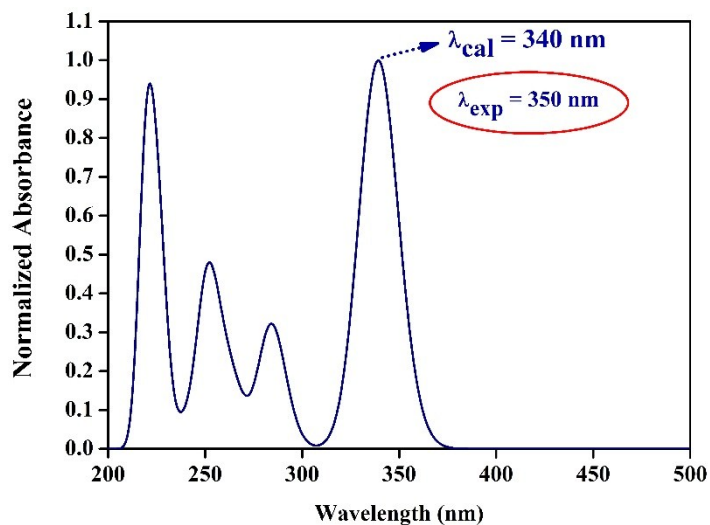

**Fig. S7** The UV-visible absorption spectrum of PPPSO2 simulated in dichloromethane.

**Table S1.** The results of TDDFT calculations.

| Transition            | $\lambda_{\text{cal}}$<br>(nm) | $f$    | CI<br>Coefficient | Dominant<br>Contribution (%)     |
|-----------------------|--------------------------------|--------|-------------------|----------------------------------|
| $S_0 \rightarrow S_1$ | 340                            | 1.7652 | 0.5009            | HOMO $\rightarrow$ LUMO (50)     |
| $S_0 \rightarrow S_2$ | 331                            | 0.2400 | 0.4882            | HOMO-1 $\rightarrow$ LUMO (48)   |
| $S_0 \rightarrow S_3$ | 315                            | 0.0004 | 0.3070            | HOMO-3 $\rightarrow$ LUMO+1 (19) |
| $S_0 \rightarrow S_4$ | 314                            | 0.0006 | 0.2679            | HOMO-5 $\rightarrow$ LUMO (14)   |
| $S_0 \rightarrow S_5$ | 289                            | 0.0837 | 0.4932            | HOMO $\rightarrow$ LUMO+2 (49)   |

Calculated absorption wavelengths ( $\lambda_{\text{cal}}$ ), oscillator strengths ( $f$ ), and coefficient of configuration interaction (CI) with the dominant contribution obtained at TD-CAM-B3LYP/6-31G(d) level.
